# Supplementary material for: Unveiling a novel memory center in human brain: neurochemical identification of the nucleus incertus, a key pontine locus implicated in stress and neuropathology
Source: PubMed Central journal article supplement (PMC11253401; doi:10.1186/s40659-024-00523-z), 2024-07-16

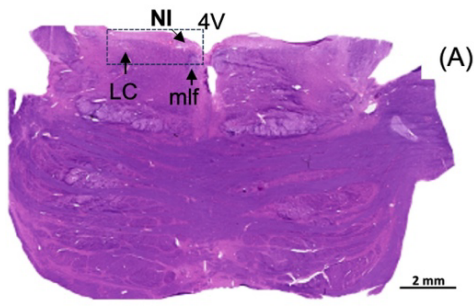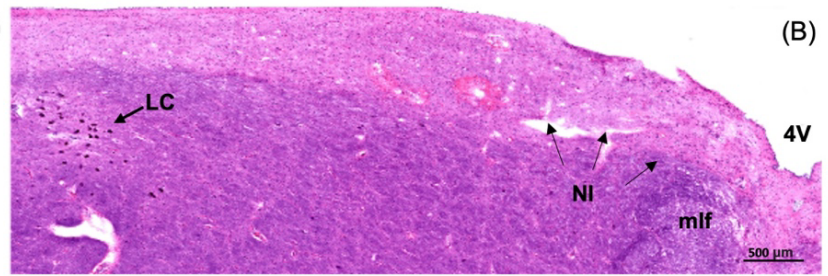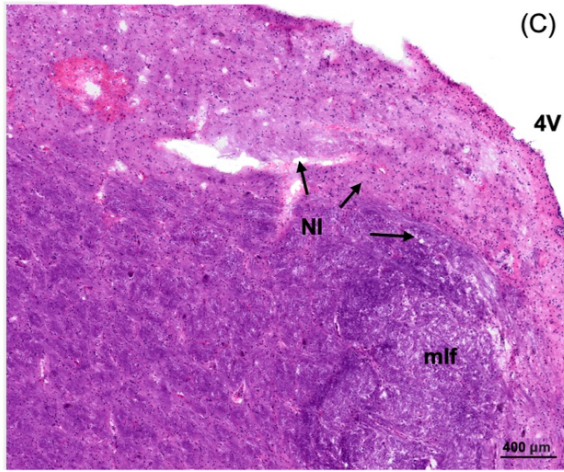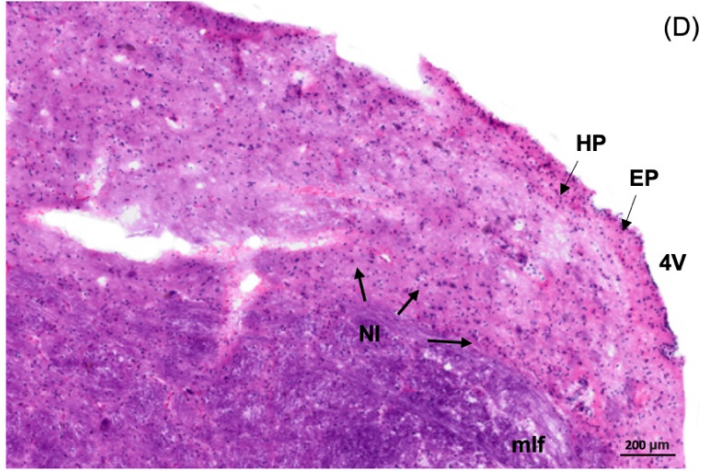

Supplement: 40659_2024_523_MOESM2_ESM.pdf [file 40659_2024_523_MOESM2_ESM.pdf]
